# Supplementary material for: Physiological DNA Damage Promotes Functional Polyploidization of Mammary Gland Alveolar Cells During Lactation
Source: Research Square preprint supplement (doi:10.21203/rs.3.rs-1697967/v1), 2022-05-27
Supplement: Supplementary file 1 [file 87f50b9fa4b2bdc09ab1250e.pdf]

Supplementary Figures

Physiological DNA damage Promotes Functional Polyplodization of Mammary Gland Alveolar Cells During Lactation.

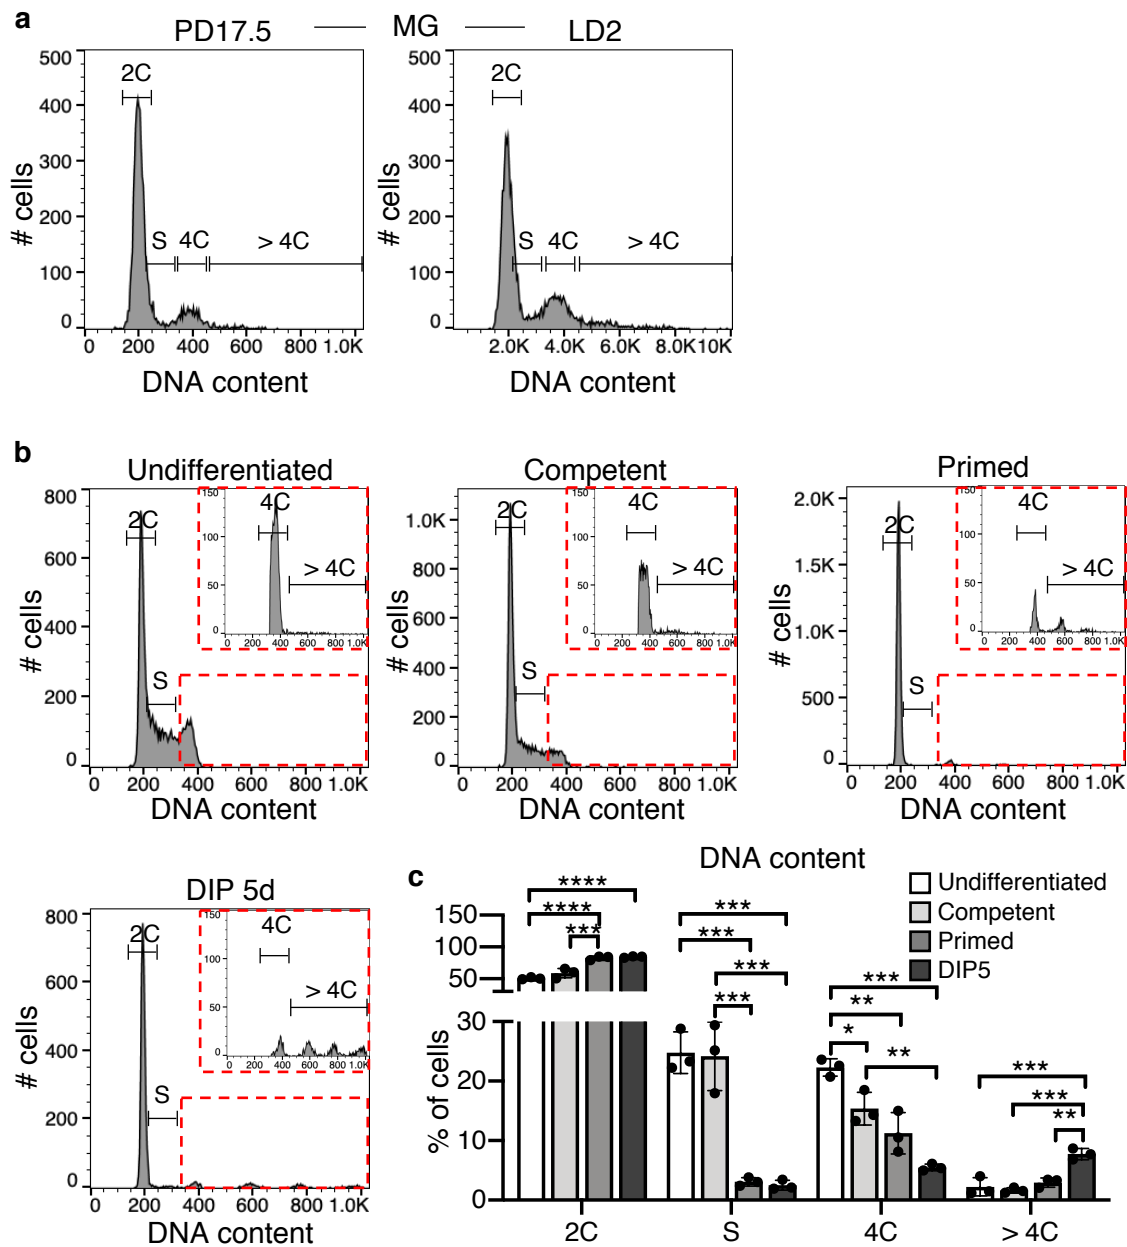

Supp. Figure 1

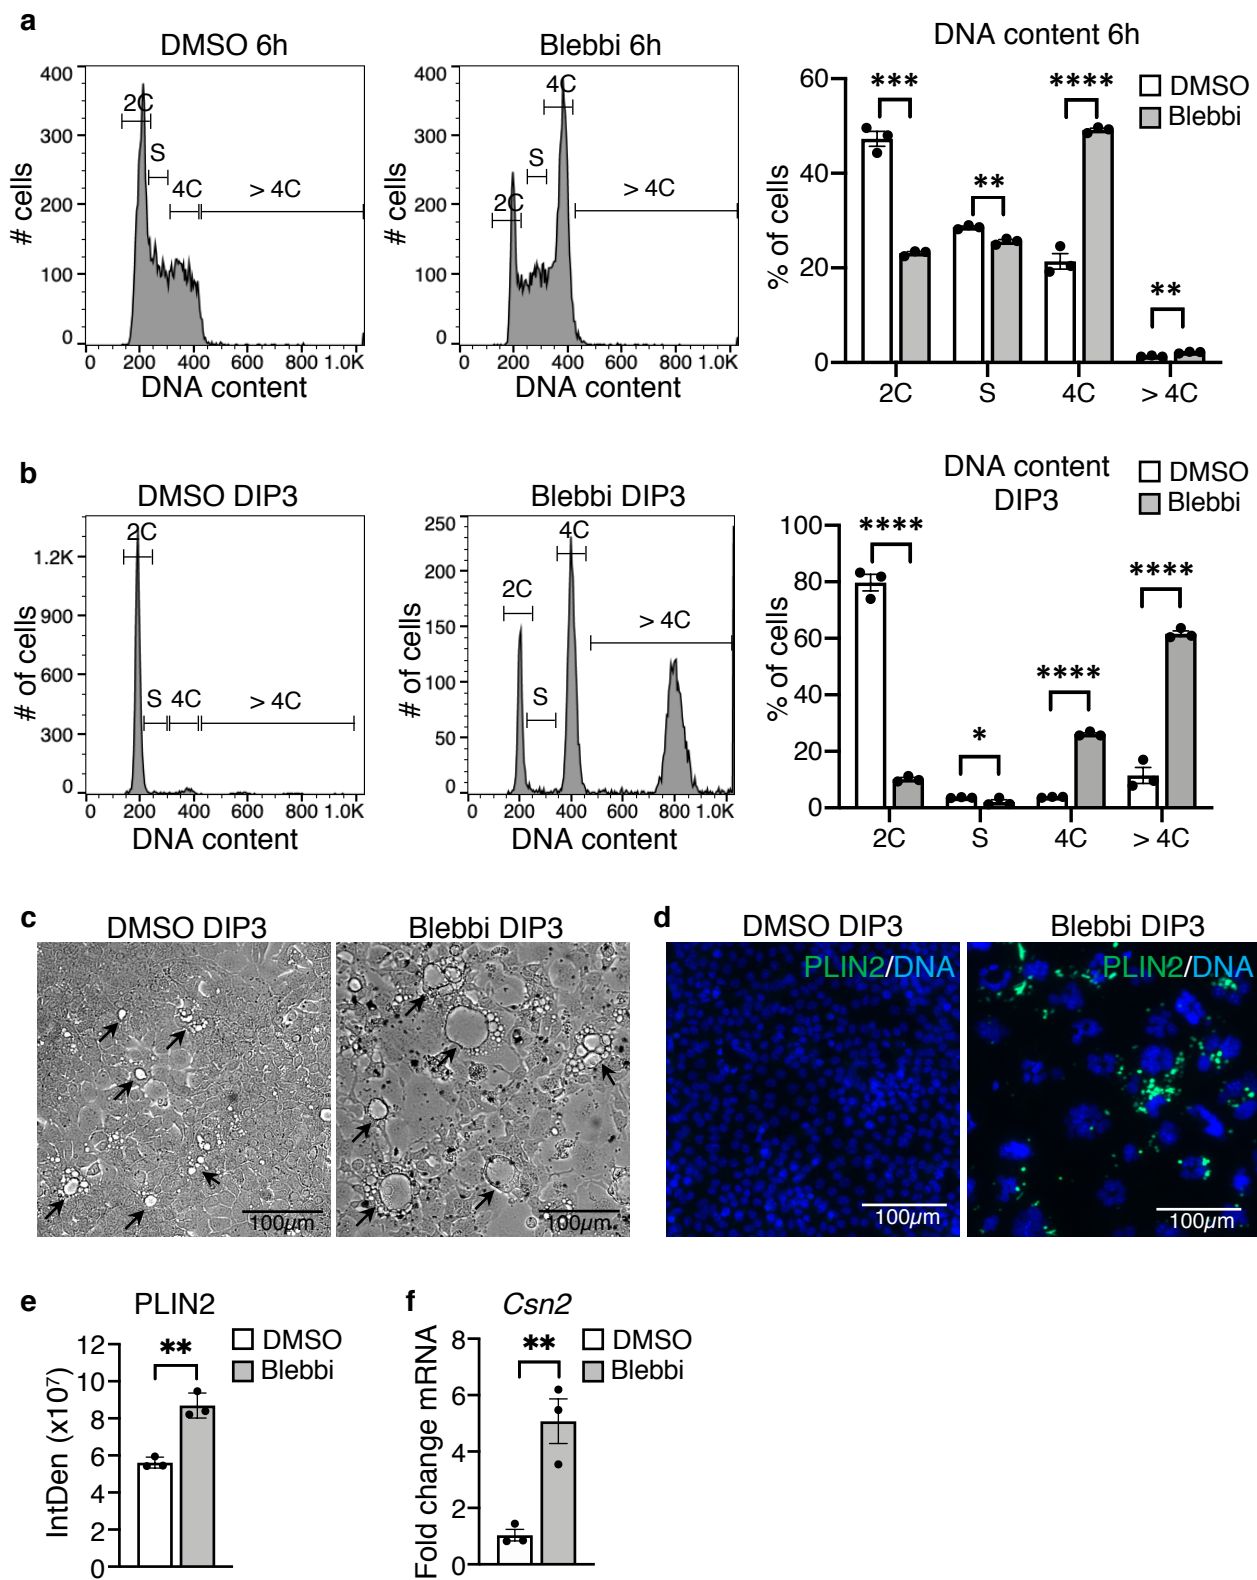

Supp. Figure 2

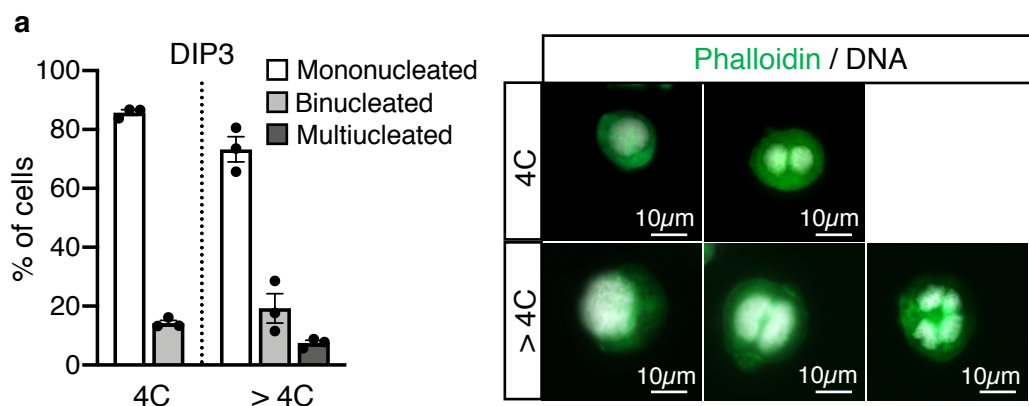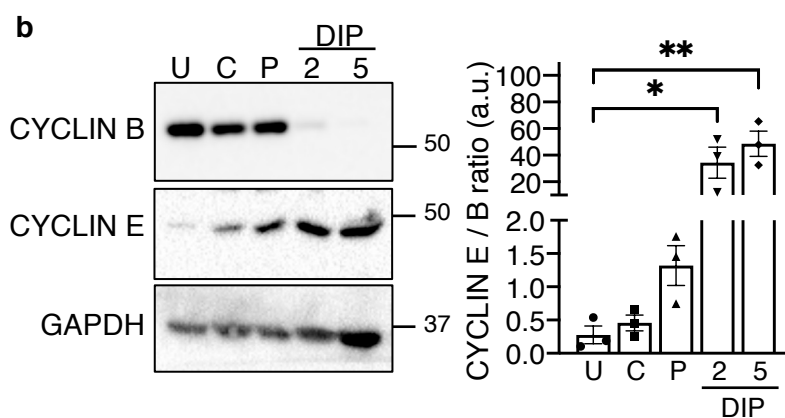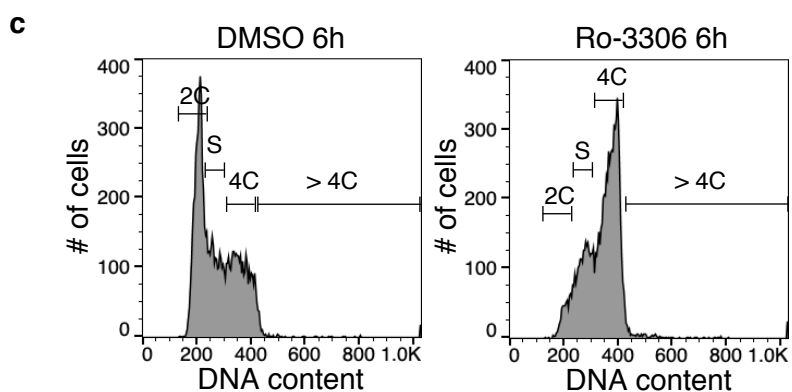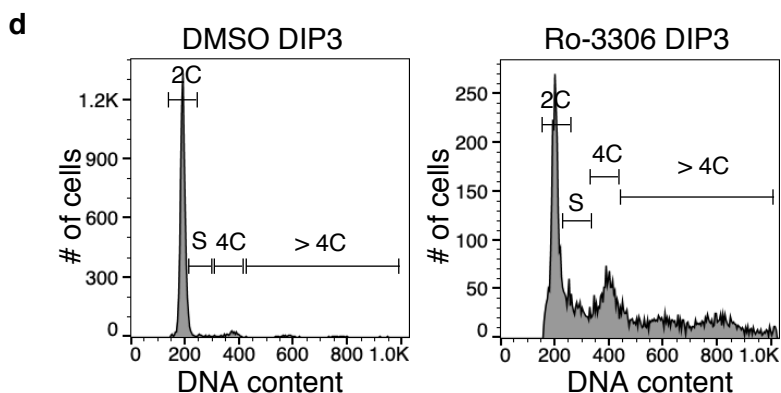

Supp. Figure 3

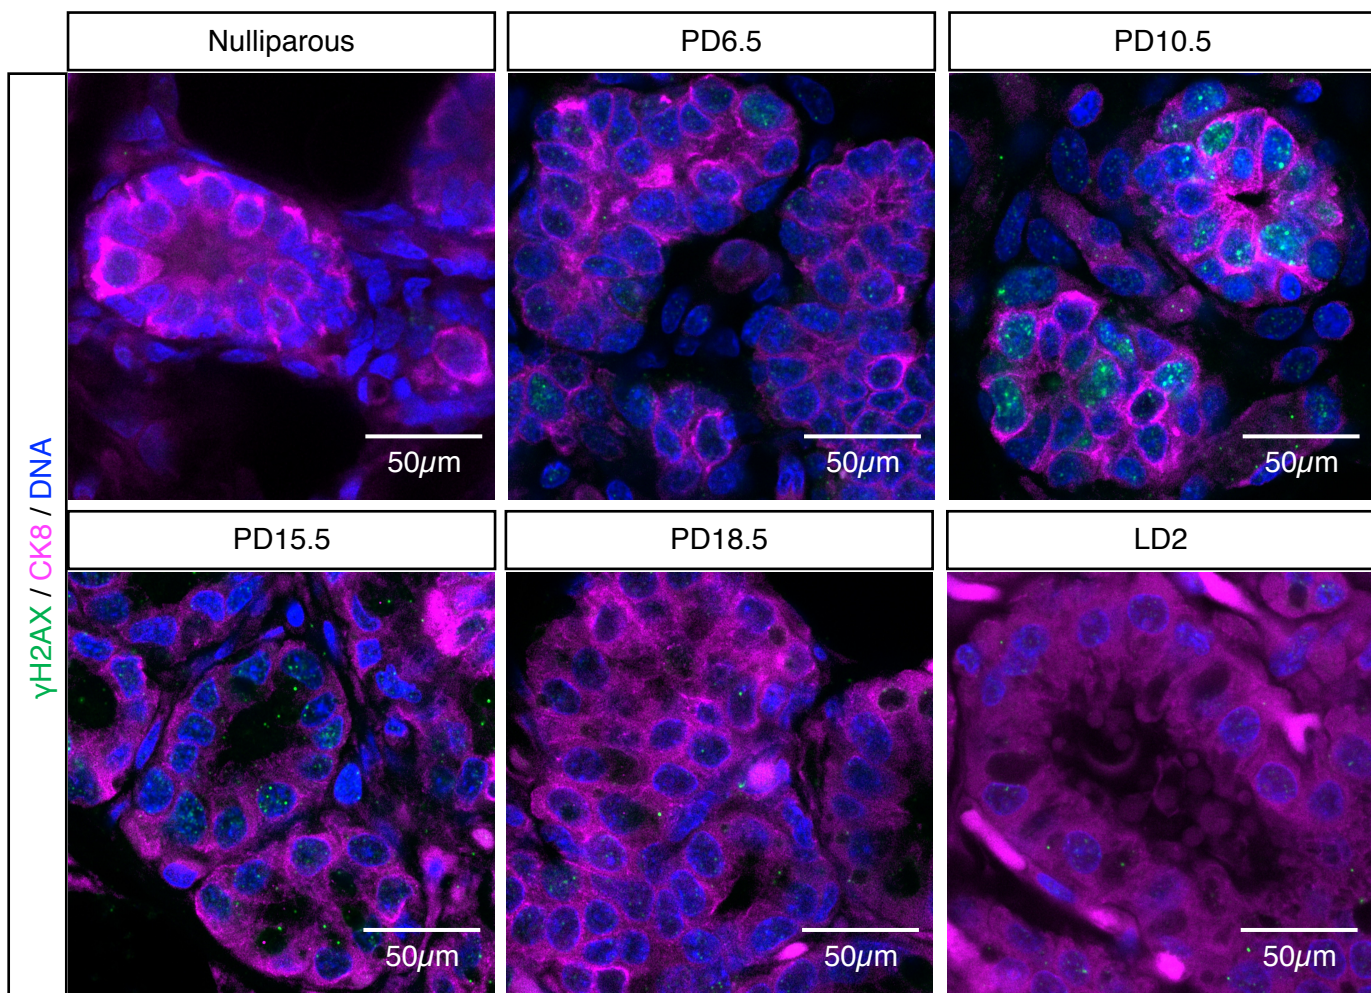

Suppl Figure 4



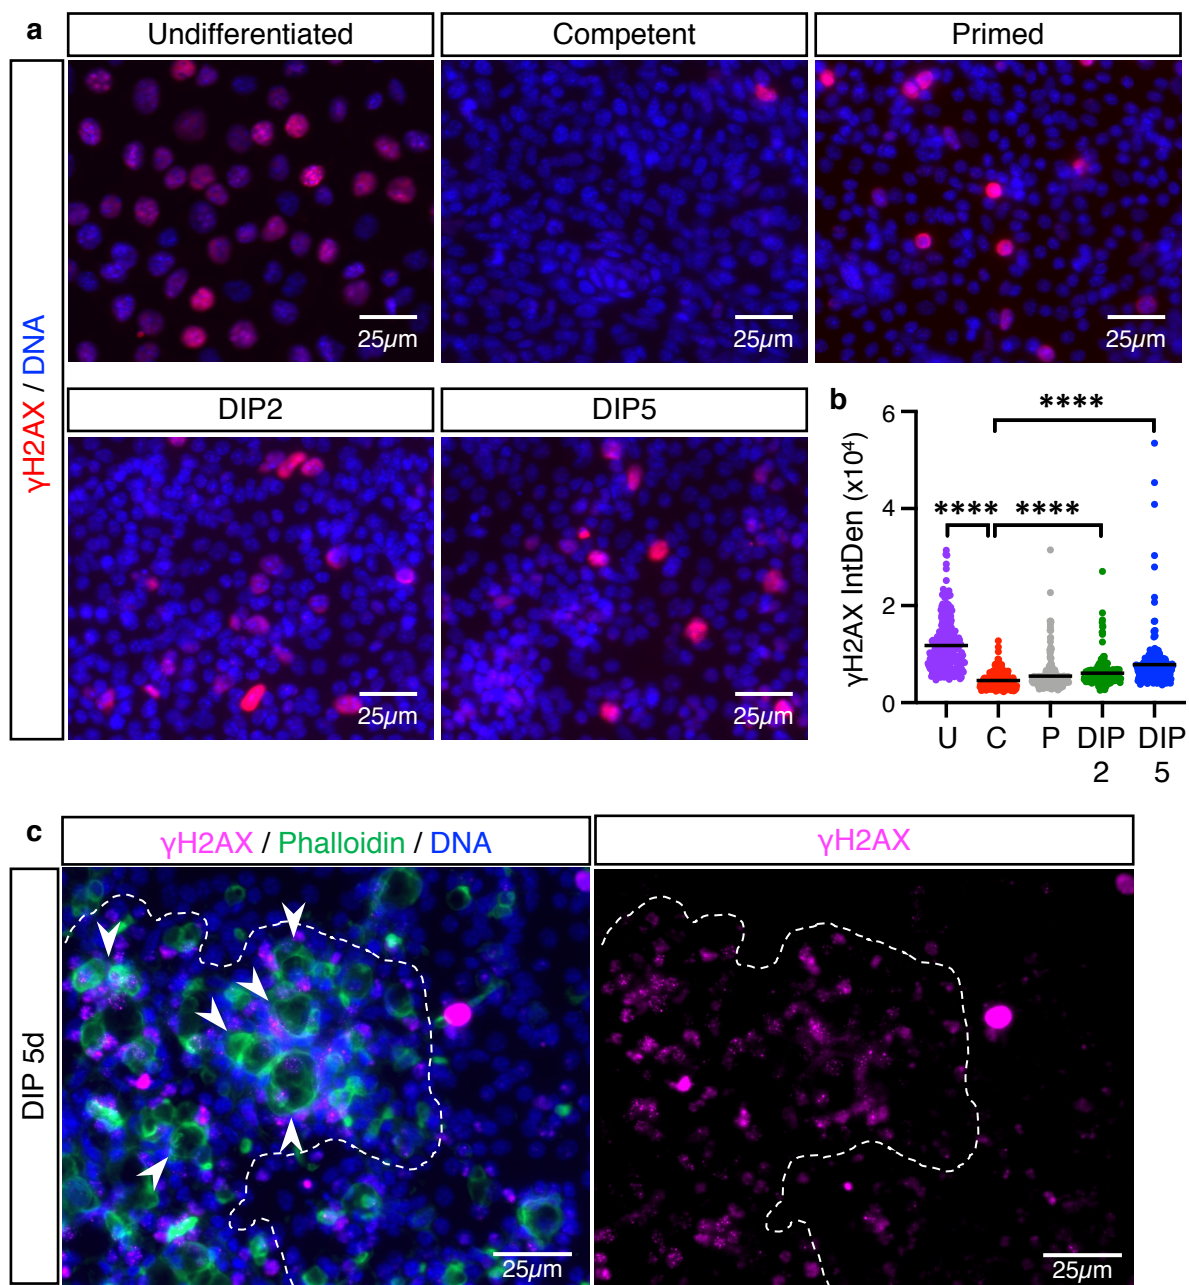

Suppl Figure 5

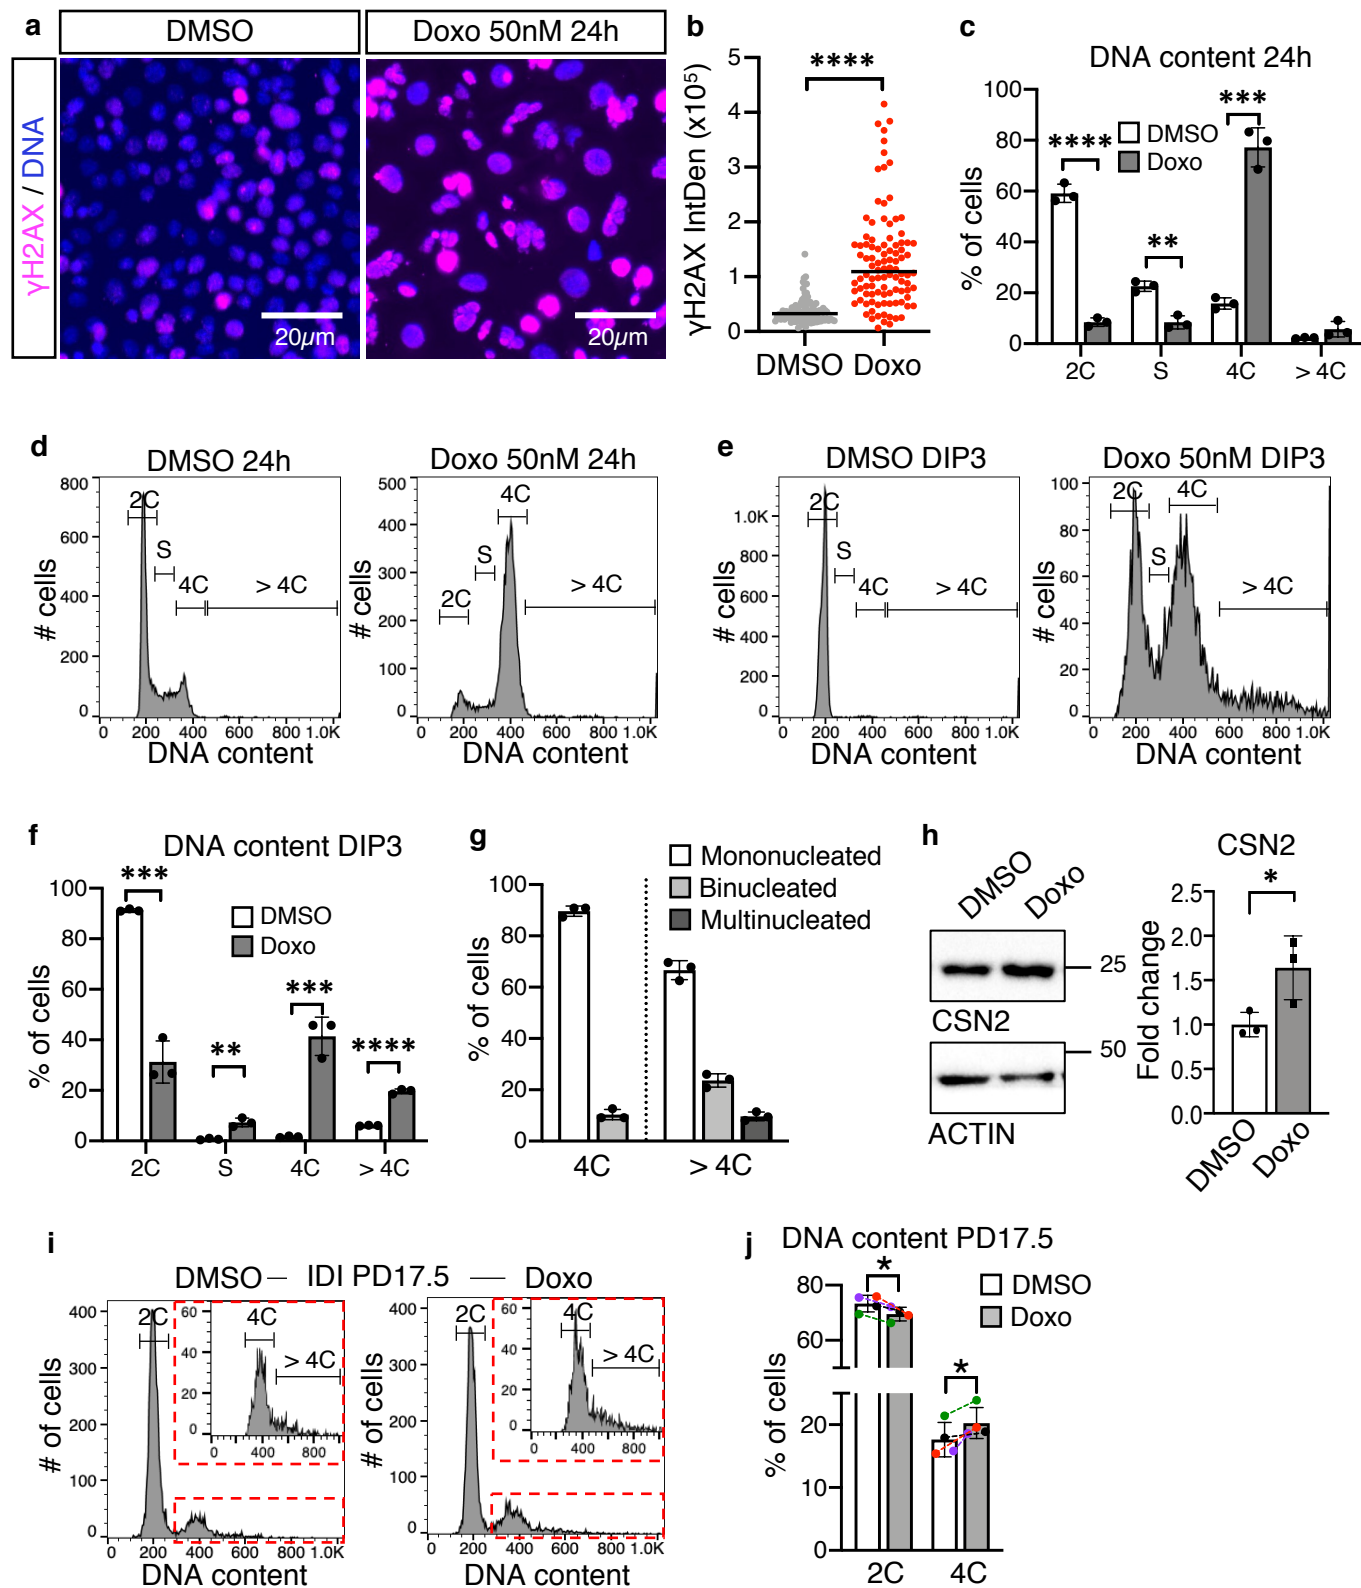

Suppl Figure 6

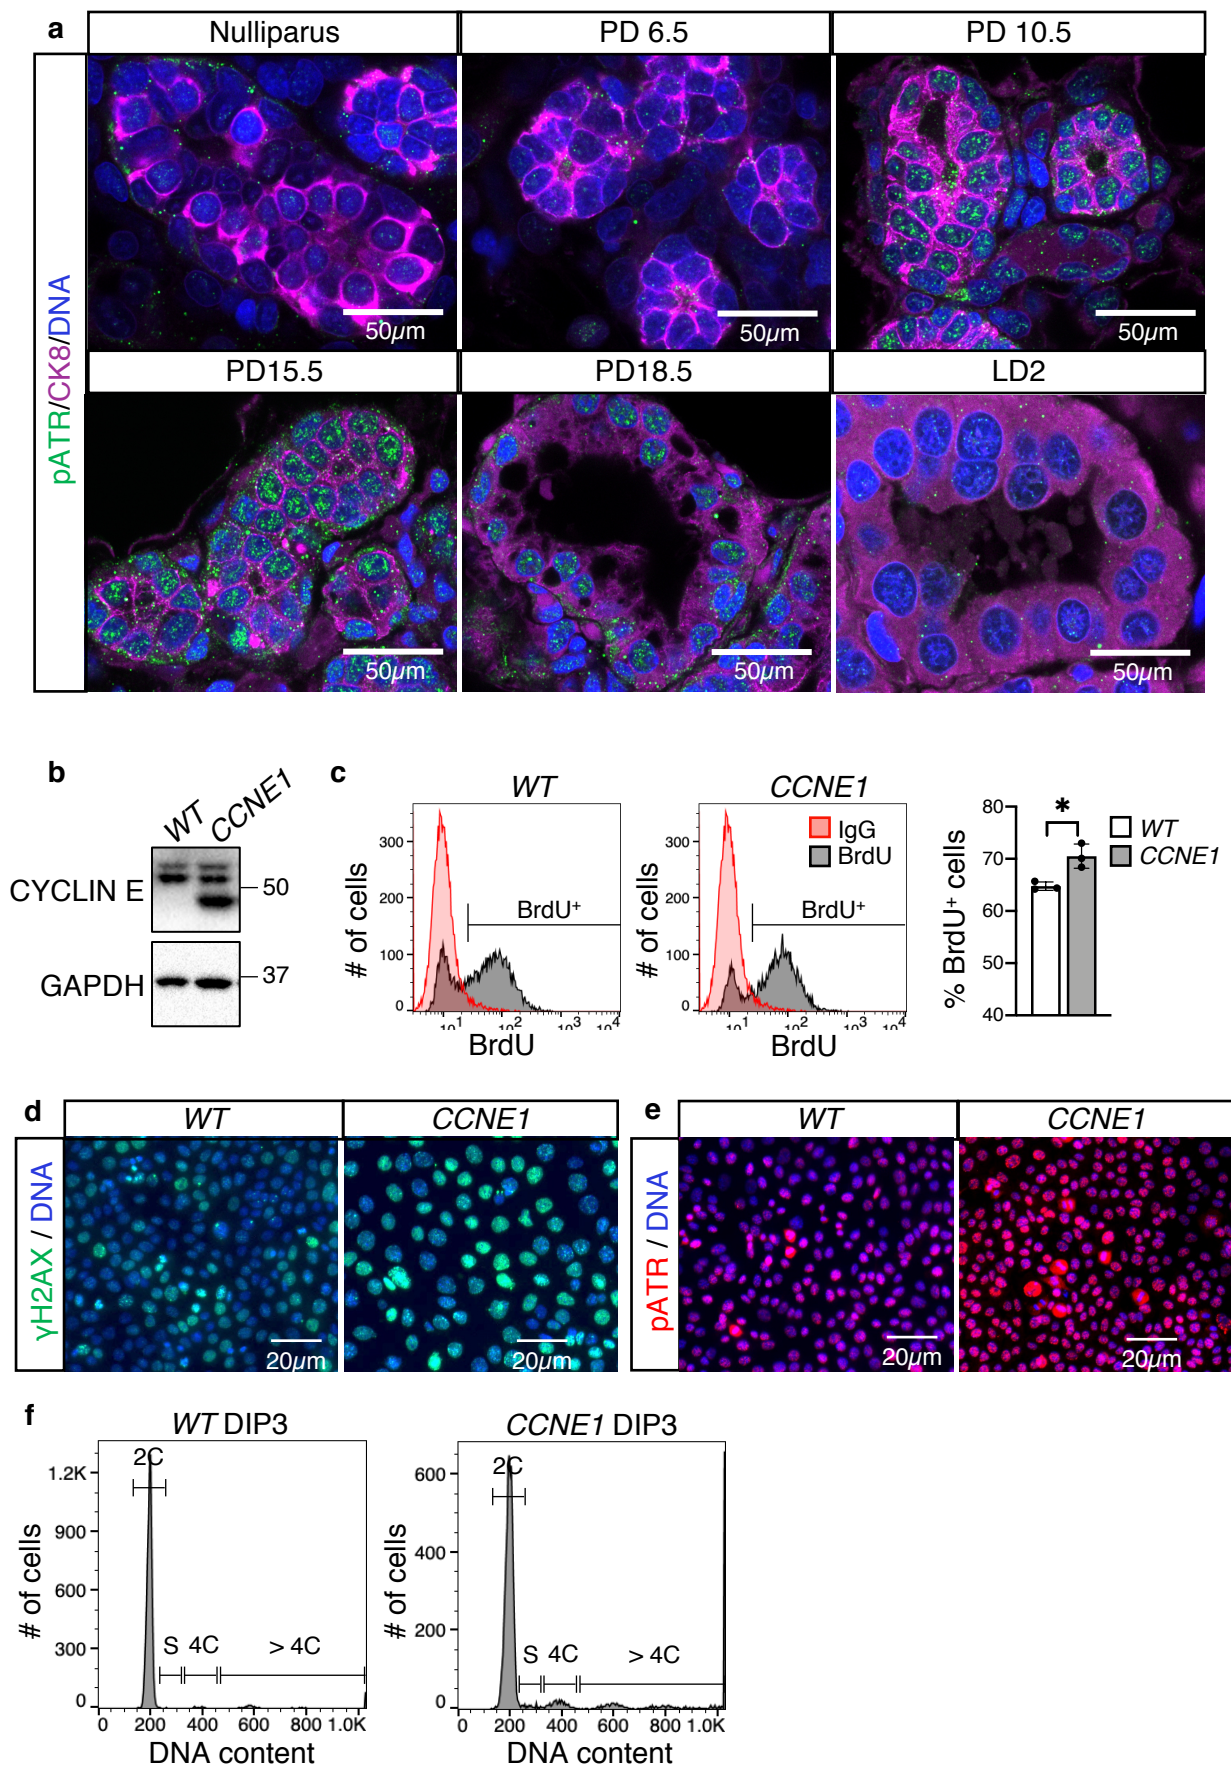

Suppl. Figure 7

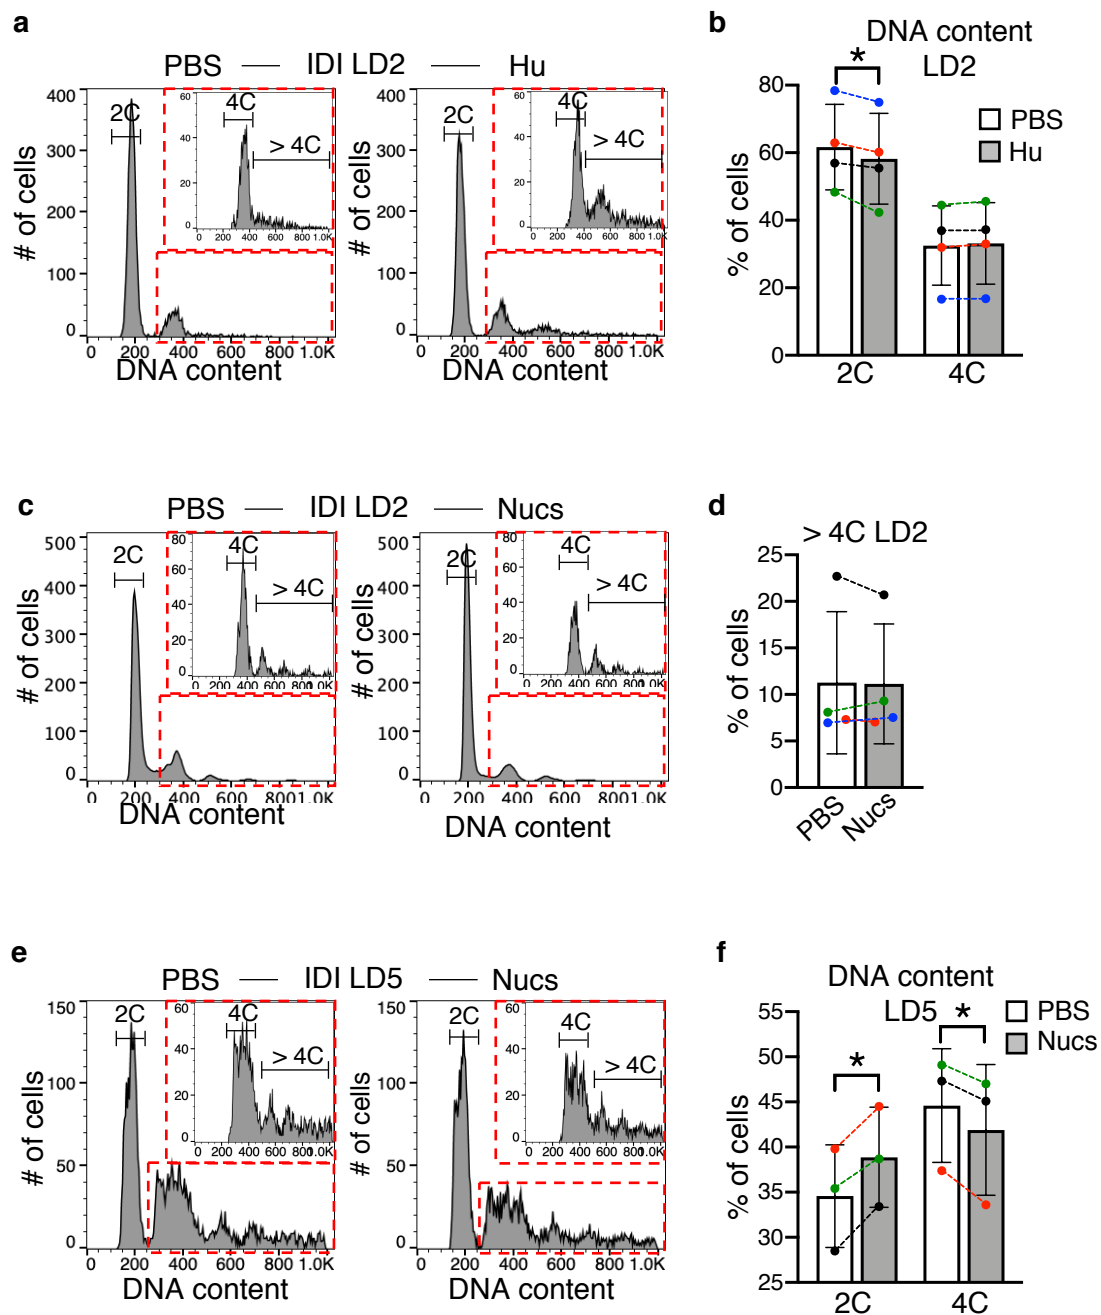

Suppl. Figure 8



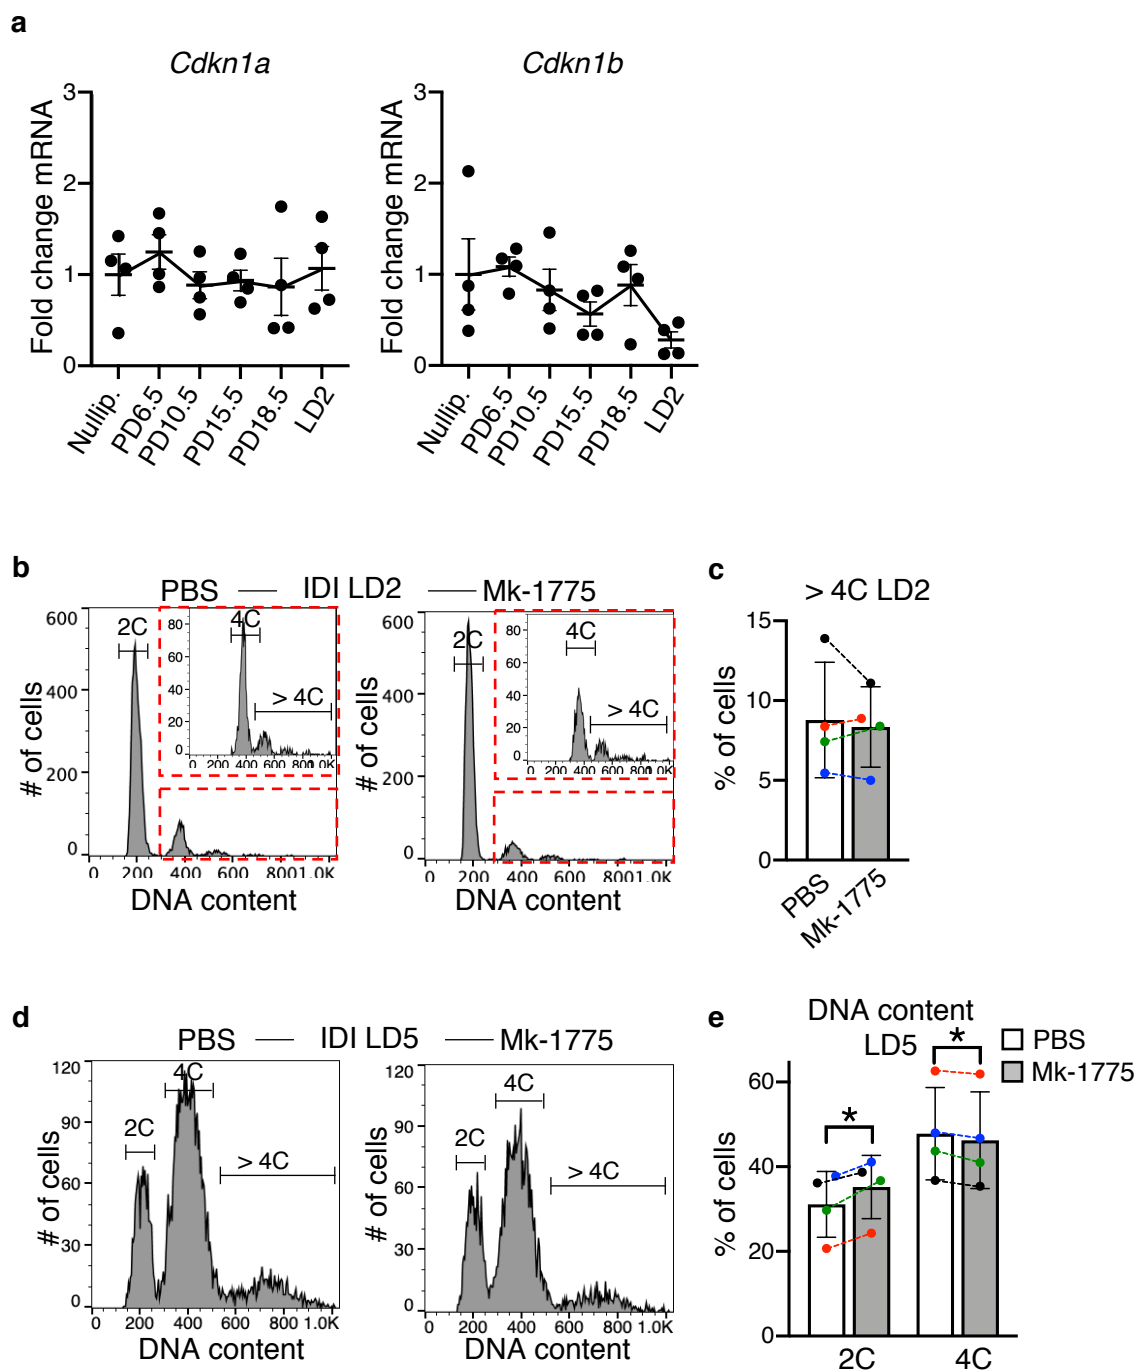

Suppl. Figure 9

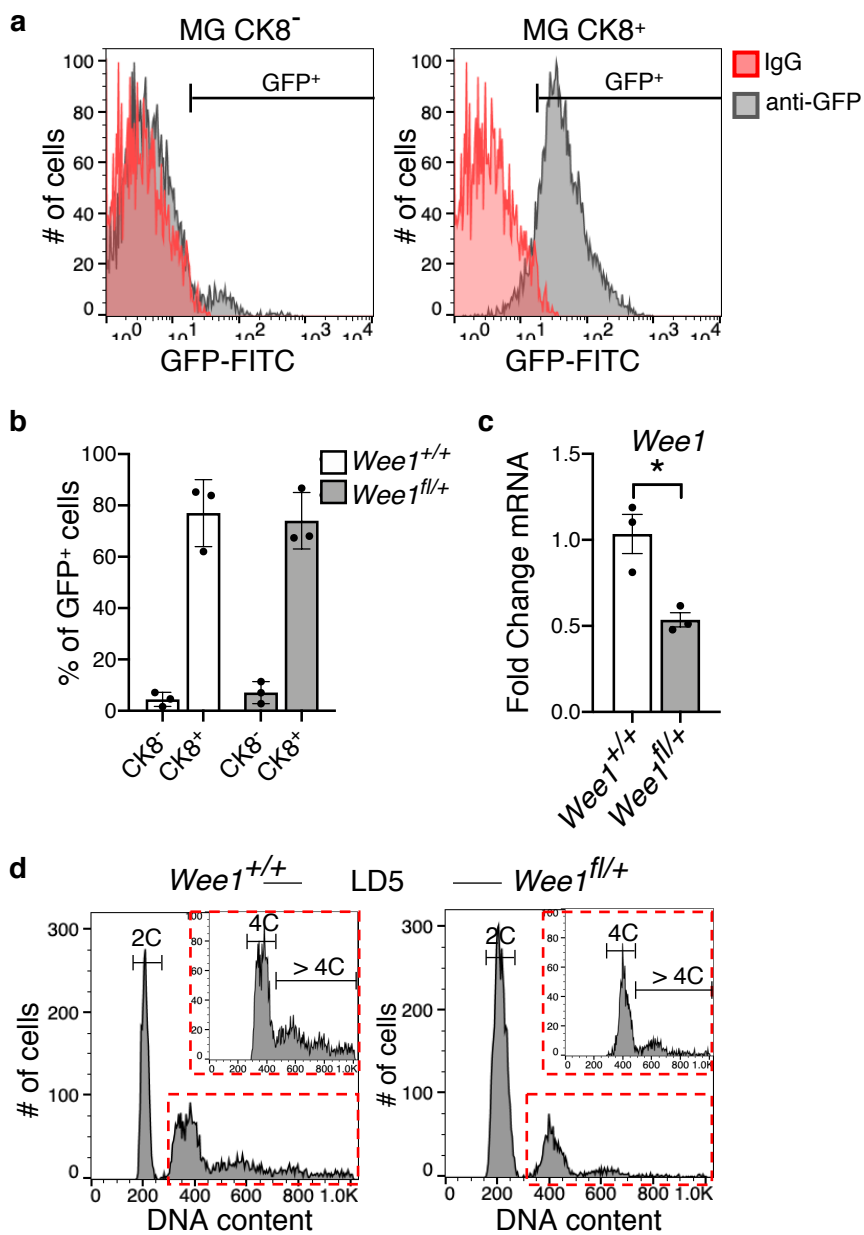

Suppl. Figure 10

## **Supplementary Figure Legends**

### **Supplementary Figure 1. Endoreplication occurs during lactogenic differentiation.**

**a)** Representative FACS histograms for DNA content analysis of the CK8<sup>+</sup> population in PD17.5 (left) and LD2 MGs (right). **b)** Representative FACS histograms for DNA content analysis of undifferentiated, competent, primed and differentiated (DIP5) HC11 cells. Red broken lines show a magnification of the histogram corresponding to the 4C and >4C populations. Histograms are representative of n=3 biological replicates. **c)** Quantification of FACS DNA content analysis showing the percentage of undifferentiated, competent, primed and differentiated (DIP5) HC11 cells with 2C, 4C or > 4C DNA content or in the S phase. Data shown as the mean  $\pm$  SD; n=3 biological replicates; one-way ANOVA Tukey's test. p values: \* < 0.05, \*\* < 0.001, \*\*\* < 0.0005, \*\*\*\* < 0.0001.

### **Supplementary Figure 2. Cytokinesis failure results in endoreplication and increased milk production.**

**a)** Representative FACS histograms for DNA content analysis (left) and quantification (right) of undifferentiated HC11 treated with DMSO or blebbistatin (Blebbi) for 6 hours. **b)** Representative FACS histograms for DNA content analysis (left) and quantification (right) of differentiated HC11 (DIP3) treated with DMSO or Blebbi. **c)** Phase contrast images of showing milk domes in differentiated (DIP3) HC11, treated with DMSO or Blebbi. **d)** Detection of Perilipin2 (PLIN2, green) in differentiated (DIP3) HC11, treated with DMSO or Blebbi. Nuclear DNA by Hoechst. Images are representative of n=3 biological replicates. **e)** Quantification of PLIN2 expression in differentiated (DIP3) HC11, treated with DMSO or Blebbi. **f)** Quantification of *Csn2* expression in differentiated (DIP3) HC11, treated with DMSO or Blebbi, as detected by RT-qPCR. Data shown as the mean  $\pm$  SD except for **(f)** data shown as mean  $\pm$  S.E.M; n=3 biological replicates; two-tailed Student's t-test. p values: \* < 0.05, \*\* < 0.001, \*\*\* < 0.0005, \*\*\*\* < 0.0001.

### **Supplementary Figure 3. HC11 undergo endoreplication through an early mitotic arrest involving Cdk1 inactivation.**

**a)** Representative images (left) and quantification (right) of mono-, bi- and multinucleated (more than 2 nuclei) differentiated (DIP3) HC11, sorted based on DNA content (4C or >4C). Nuclear DNA by propidium iodide. Phalloidin shown in green. Data shown as the mean  $\pm$  S.E.M; n=3 biological replicates. **b)** Representative western blot showing the expression of CYCLIN E and CYCLIN B in undifferentiated (U), competent (C), primed (P) and differentiated (DIP 2 and 5) HC11. Right histogram shows the quantification of the CYCLIN E: CYCLIN B ratio during HC11 differentiation. Data shown as the mean  $\pm$  S.E.M; n=3 biological replicates; two-tailed un-paired Student's t-test. **c)** Representative FACS histograms for DNA content analysis of undifferentiated HC11 treated with DMSO or Ro-3306 for 6 hours. **d)** Representative FACS histograms for DNA content analysis of differentiated HC11 (DIP3) treated with DMSO or Ro-3306. p values: \* < 0.05, \*\* < 0.001.

### **Supplementary Figure 4. Physiological DNA damage occurs during pregnancy in the MG**

**in vivo.** Detection of  $\gamma$ H2AX (green) in optical-cleared MG sections in nulliparous, PD6.5, PD10.5, PD15.5, PD18.5 and LD2. CDK8 shown in magenta. Nuclear DNA by propidium iodide. Images are representative of n=3 biological replicates.

**Supplementary Figure 5. Physiological DNA damage occurs during HC11 lactogenic differentiation.** **a)** Detection of  $\gamma$ H2AX (red) in undifferentiated, competent, primed and differentiated (DIP 2 and 5) HC11. Nuclear DNA by Hoechst. Images are representative of n=3 biological replicates. **b)** Quantification of  $\gamma$ H2AX Integrated Density (IntDen) detected in HC11 throughout differentiation. Data show values from 100 cells per time-point and are representative of n=3 biological replicates. Black horizontal bars represent the mean. Dunn's multiple comparison test. **c)** Representative images of differentiated HC11 (DIP5) showing that  $\gamma$ H2AX (magenta) is high in areas with dome formation (white broken line, Phalloidin, green) Domes are indicated by arrows. Nuclear DNA by Hoechst. p values: \*\*\*\* < 0.0001.

**Supplementary Figure 6. DNA damage increases endoreplication and milk production *in vitro*.** **a)** Detection of  $\gamma$ H2AX (magenta) in undifferentiated HC11 treated with DMSO or doxorubicin (Doxo) for 24 hours. Nuclear DNA by Hoechst. Images are representative of n=3 biological replicates. **b)** Quantification of  $\gamma$ H2AX Integrated Density (IntDen) 24 hours after treatment with DMSO or Doxo. Data show values from 100 cells per treatment and are representative of n=3 biological replicates. Black horizontal bars represent the mean. Mann-Whitney test. **c)** Quantification of FACS DNA content analysis showing the percentage of undifferentiated HC11 cells with 2C, 4C or > 4C DNA content, or in the S phase, 24 hours after treatment with DMSO or Doxo. Data shown as the mean  $\pm$  SD; n=3 biological replicates; two-tailed unpaired Student's t-test. **d and e)** Representative FACS histograms for DNA content analysis of undifferentiated (**d**) and DIP3 (**e**) HC11 treated with DMSO or Doxo. **f)** Quantification of FACS DNA content analysis showing the percentage of differentiated (DIP3) HC11 cells with 2C, 4C or > 4C DNA content, or in the S phase, after treatment with DMSO or Doxo. Data shown as the mean  $\pm$  SD; n=3 biological replicates; two-tailed unpaired Student's t-test. **g)** Quantification of differentiated HC11 (DIP3) treated with DMSO or Doxo, and sorted based on DNA content (4C or > 4C), that are mono-, bi- or multinucleated (more than 2 nuclei). Data shown as the mean  $\pm$  S.E.M; n=3 biological replicates. **h)** Representative western Blot (left) and quantification (right) of CSN2 expression in differentiated HC11 (DIP3) after DMSO or Doxo treatment. Data shown as the mean  $\pm$  SD; n=3 biological replicates; two-tailed unpaired Student's t-test. **i)** Representative FACS DNA content analysis histograms from CK8<sup>+</sup> PD17.5 MGs after contralateral IDI with DMSO or doxorubicin (Doxo). Red broken lines show a magnification of the histogram corresponding to the 4C and >4C populations. Data are representative of n=3 biological replicates. **j)** Quantification of the percentage of CK8<sup>+</sup> cells with 2C and 4C DNA content, detected by FACS analysis, after contralateral IDI with DMSO or Doxo in PD17.5 MGs. Data shown as the mean  $\pm$  SD; n=4 biological replicates; two-tailed paired Student's t-test. p values: \* < 0.05, \*\* < 0.001, \*\*\* < 0.0005, \*\*\*\* < 0.0001.

**Supplementary Figure 7. Replication stress activates the DNA damage response and results in increased endoreplication and milk production.** **a)** Detection of pATR (green) in optical-cleared MG sections in nulliparous, PD6.5, PD10.5, PD15.5, PD18.5 and LD2. CK8 shown in magenta. Nuclear DNA by propidium iodide. Images are representative of n=3 biological replicates. **b)** Detection of CYCLIN E by Western Blot in wild-type (*WT*) or Cyclin E overexpressing (*CCNE1*) HC11. **c)** Representative FACS histograms showing BrdU incorporation in *WT* and *CCNE1* undifferentiated HC11. Red histogram represents the negative isotype control (IgG). Black gate represents the identification of the BrdU<sup>+</sup> cells according to negative isotype control. Right histogram shows the quantification of *WT* or *CCNE1* HC11 that



are BrdU<sup>+</sup>. Data shown as the mean  $\pm$  SD; n=3 biological replicates; two-tailed un-paired Student's t-test. **d)** Detection of  $\gamma$ H2AX (green) in undifferentiated WT or *CCNE1* HC11. Nuclear DNA by Hoechst. Images are representative of n=3 biological replicates. **e)** Detection of pATR (red) in undifferentiated *WT* or *CCNE1* HC11. Nuclear DNA by Hoechst. Images are representative of n=3 biological replicates. **f)** Representative FACS histograms for DNA content analysis of *WT* or *CCNE1* differentiated (DIP3) HC11. p values: \* < 0.05.

**Supplementary Figure 8. The DNA damage response to replication stress regulates endoreplication *in vivo*.**

**a)** Representative FACS DNA content analysis histograms from CK8<sup>+</sup> LD2 MGs after contralateral IDI with PBS or hydroxyurea (Hu). Red broken lines show a magnification of the histogram corresponding to the 4C and >4C populations. Histograms are representative of n=3 biological replicates. **b)** Quantification of the percentage of CK8<sup>+</sup> cells with 2C or 4C DNA content, detected by FACS analysis, after contralateral IDI with PBS or Hu in LD2 MGs. Data shown as the mean  $\pm$  SD; n=4 biological replicates; two-tailed paired Student's t-test. **c)** Representative FACS DNA content analysis histograms from CK8<sup>+</sup> LD2 MGs after contralateral IDI with PBS or nucleosides (Nucs). Red broken lines show a magnification of the histogram corresponding to the 4C and >4C populations. Histograms are representative of n=4 biological replicates. **d)** Quantification of the percentage of CK8<sup>+</sup> cells with > 4C DNA content, detected by FACS analysis, after contralateral IDI with PBS or Nucs in LD2 MGs. Data shown as the mean  $\pm$  SD; n=4 biological replicates; two-tailed paired Student's t-test. **e)** Representative FACS DNA content analysis histograms from CK8<sup>+</sup> LD5 MGs after contralateral IDI with PBS or nucleosides (Nucs). Red broken lines show a magnification of the histogram corresponding to the 4C and >4C populations. Histograms are representative of n=3 biological replicates. **f)** Quantification of the percentage of CK8<sup>+</sup> cells with 2C or 4C DNA content, detected by FACS analysis, after contralateral IDI with PBS or Nucs in LD5 MGs. Data shown as the mean  $\pm$  SD; n=3 biological replicates; two-tailed paired Student's t-test. p values: \* < 0.05.

**Supplementary Figure 9. The DNA damage response to replication stress regulates endoreplication through WEE1.**

**a)** Quantification of *Cdkn1a* (left) and *Cdkn1b* (right) expression in whole tissue from nulliparous, PD6.5, PD10.5, PD15.5, PD18.5 and LD2 MGs, as detected by RT-qPCR. Data shown as the mean  $\pm$  S.E.M; n=4 for biological replicates. one-way ANOVA Tukey's test. **b)** Representative FACS DNA content analysis histograms from CK8<sup>+</sup> LD2 MGs after contralateral IDI with DMSO or Mk-1775. Red broken lines show a magnification of the histogram corresponding to the 4C and >4C populations. Histograms are representative of n=4 biological replicates. **c)** Quantification of the percentage of CK8<sup>+</sup> cells with > 4C DNA content, detected by FACS analysis, after contralateral IDI with DMSO or Mk-1775 in LD2 MGs. Data shown as the mean  $\pm$  SD; n=4 biological replicates; two-tailed paired Student's t-test. **d)** Representative FACS DNA content analysis histograms from CK8<sup>+</sup> LD5 MGs after contralateral IDI with DMSO or nucleosides Mk-1775. Red broken lines show a magnification of the histogram corresponding to the 4C and >4C populations. Histograms are representative of n=3 biological replicates. **e)** Quantification of the percentage of CK8<sup>+</sup> cells with 2C or 4C DNA content, detected by FACS analysis, after contralateral IDI with DMSO or Mk-1775 in LD5 MGs. Data shown as the mean  $\pm$  SD; n=4 biological replicates; two-tailed paired Student's t-test. p values: \* < 0.05.

**Supplementary Figure 10. WEE1 regulates alveolar endoreplication and milk production during lactation.** **a)** FACS analysis of mammary gland (MG) single cell preparation for the identification of GFP<sup>+</sup> cells in the CK8<sup>-</sup> (left) and CK8<sup>+</sup> (right) populations. Red histogram represents the negative isotype control (IgG). Gate indicates GFP<sup>+</sup> cells based on negative isotype control. **b)** Quantification of the % of GFP<sup>+</sup> cells in the CK8<sup>-</sup> and CK8<sup>+</sup> populations from LD5 MGs from *Ck8-CreER/mTmG/Wee1<sup>+/+</sup>* (*Wee1<sup>+/+</sup>*) or *Ck8-CreER/mTmG/Wee1<sup>fl/+</sup>* (*Wee1<sup>fl/+</sup>*) mice. Data shown as the mean  $\pm$  SD; n=3 biological replicates; two-tailed unpaired Student's t-test. **c)** Quantification of *Wee1* expression in whole tissue from LD5 MGs from *Wee1<sup>+/+</sup>* or *Wee1<sup>fl/+</sup>* mice, as detected by RT-qPCR. Data shown as the mean  $\pm$  S.E.M; n=3 biological replicates. two-tailed unpaired Student's t-test. **d)** Representative FACS DNA content analysis histograms from CK8<sup>+</sup> LD5 MGs from *Wee1<sup>+/+</sup>* or *Wee1<sup>fl/+</sup>* mice. Red broken lines show a magnification of the histogram corresponding to the 4C and >4C populations. Histograms are representative from n=3 biological replicates. p values: \* < 0.05.
